# Supplementary material for: Achieving Influenza Vaccine Uptake Target in Canada via a Pharmacy-Led Telephone Discussion during the 2019–2020 Season
Source: MDPI journal article supplement (doi:10.3390/vaccines9040312), 2021-03-26

Supplementary File A – Strategy and flow chart of the pharmacist intervention

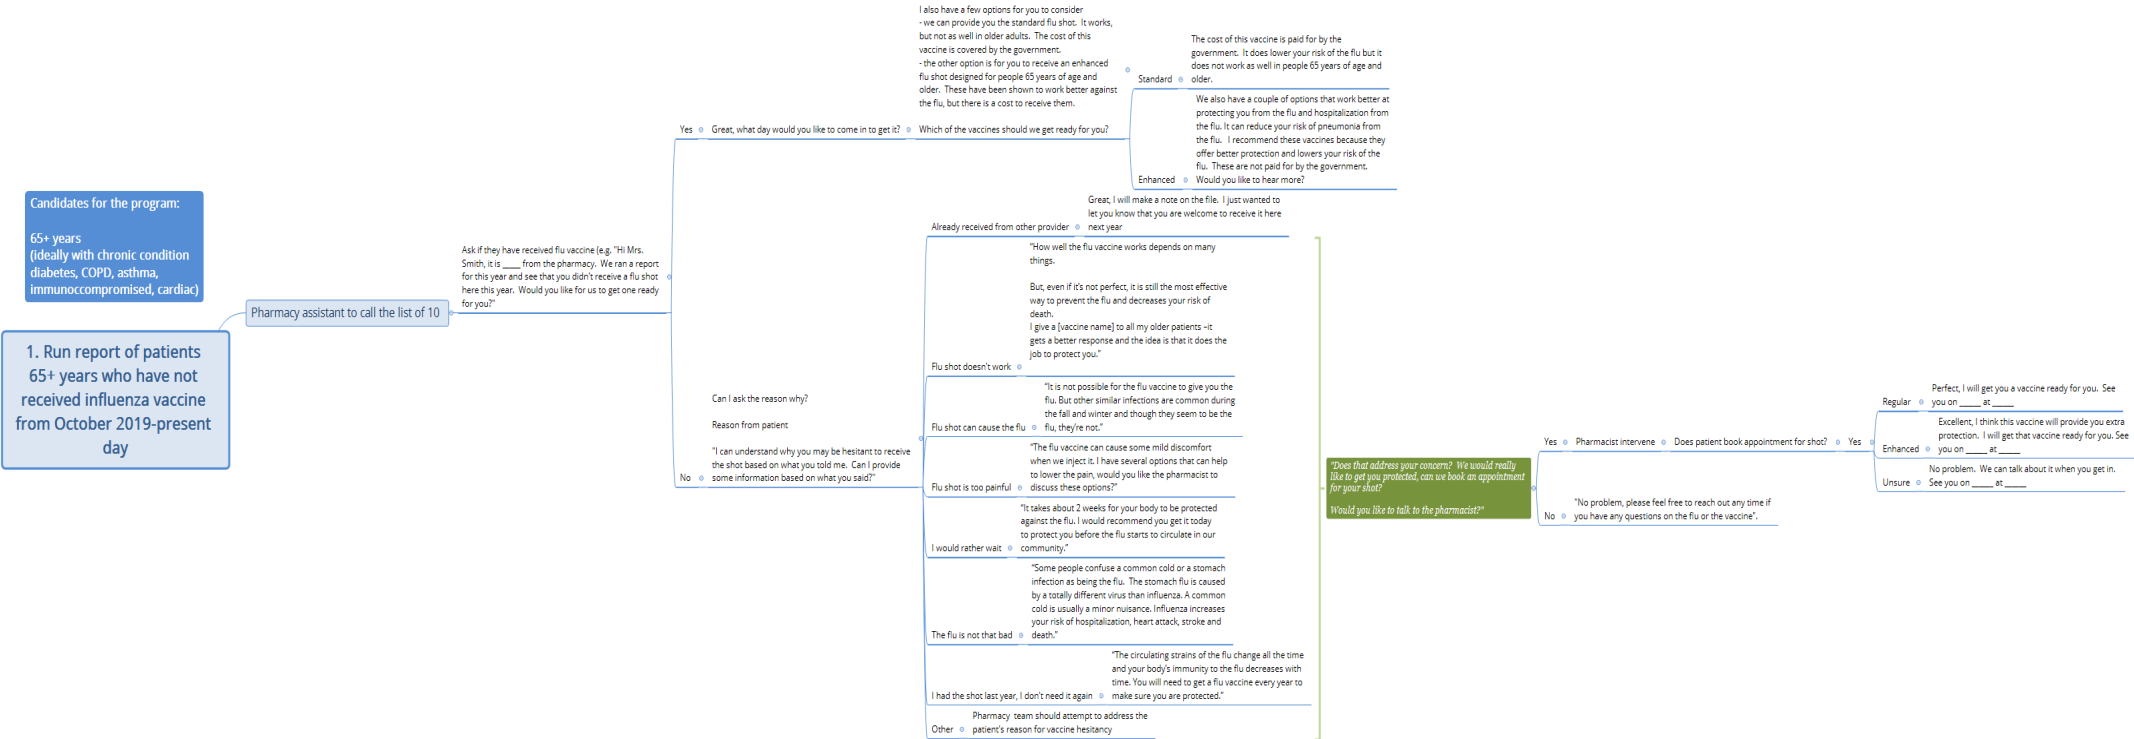

Supplement: s1 [file s1]
